# Supplementary material
Source: MDPI journal article supplement (https://www.mdpi.com/2311-7524/8/10/929)
Supplement: s1 [file s1]

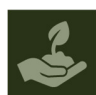

## Supplementary materials

Article

**Eradication of PPV and PNRSV viruses from peach three cultivars using thermotherapy in vitro, including optimization of microshoots multiplication and rooting medium**

Neda Hesari, Ali Haji Mohammadi, Reza Zarghami, Bratali Fakheri, Erzsébet Kiss-Bába, Anita Szegő, István Papp, Iman Mirmazloun

**Table S1.** Mean of square for morphological traits in response to Fe and cultivars interaction.

| S.o.V       | df | Plant height | Branch number | Leaf number |
|-------------|----|--------------|---------------|-------------|
| Cultivar    | 3  | 78.302**     | 3.151**       | 150.550*    |
| Fe          | 2  | 402.761**    | 4.824**       | 629.362**   |
| Cultivar*Fe | 6  | 47.241**     | 1.156**       | 56.024**    |
| Error       | 24 | 1.022        | 0.282         | 0.375       |
| CV          |    | 4.36         | 30.48         | 6.35        |

\* and \*\* show significant interactions at 5% and 1%, statistically.

**Table S2.** Mean of square for traits in response to GA<sub>3</sub> + BAP, and cultivars interaction.

| S.o.V                  | df | Plant length | Branch number | Leaf number |
|------------------------|----|--------------|---------------|-------------|
| Replication            | 2  | 3.619**      | 0.917         | 13.380      |
| Cultivars              | 3  | 39.008**     | 1.489**       | 311.461**   |
| Phytohormone           | 1  | 52.688**     | 1.238**       | 130.760**   |
| Phytohormone *cultivar | 3  | 17.822**     | 1.732**       | 224.732**   |
| error                  | 14 | 0.124        | 0.085         | 4.28        |
| CV                     |    | 4.36         | 30.48         | 6.35        |

\*\* show significant interactions at 1%, statistically.

**Table S3.** Mean of square for traits in response to GA<sub>3</sub> + TDZ, and cultivars interaction.

| S.o.V                  | df | Plant length | Branch number | Leaf number |
|------------------------|----|--------------|---------------|-------------|
| Replication            | 2  | 2.274        | 0.348         | 0.317       |
| Cultivars              | 2  | 65.297**     | 0.728*        | 66.725**    |
| Phytohormone           | 3  | 31.951**     | 0.401*        | 11.049**    |
| Phytohormone *cultivar | 6  | 35.625**     | 0.245*        | 17.492**    |
| error                  | 22 | 0.875        | 0.193         | 0.198       |
| CV                     |    | 4.29         | 29.36         | 4.79        |

\* and \*\* show significant interactions at 5 and 1%, statistically.
